# Supplementary material
Source: PubMed Central journal article supplement (PMC2077463)
Supplement: jnnpsyc_77_6_790__1.pdf [file jnnpsyc_77_6_790__1.pdf]

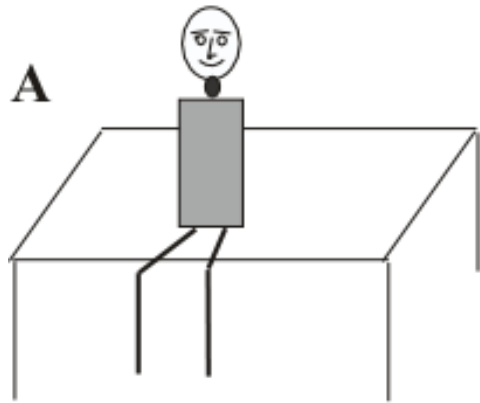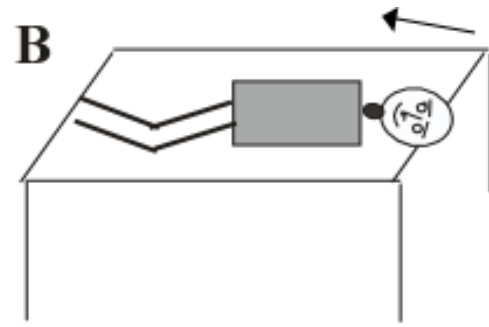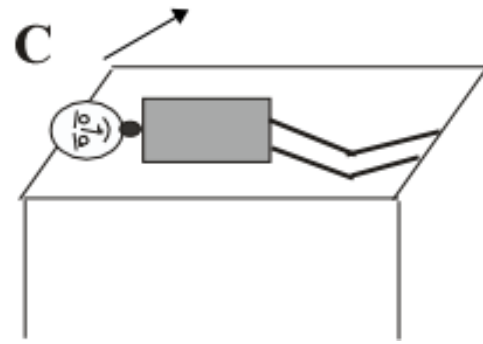

### Legend to supplemental drawing

(A) When the patient was in upright position, a slight, horizontal gaze evoked nystagmus upon looking to the left or to the right was observed. (B) By bringing her into a left ear down and slightly head-hanging position she would develop persistent downbeat nystagmus, the fast phase direction of which is indicated by the arrow. Note that the positioning manoeuvre took place within her frontal plane, which is different from the plane of the left posterior semicircular canal. The same holds for the direction of the observed nystagmus, which would last as long as the off-vertical head position was maintained. These features differentiated the present case from BPPV. (C) In the right ear down position the downbeat nystagmus is also sustained but less intense and has an apogeotropic component (that is, towards the uppermost left ear) as indicated by the arrow.
